# Supplementary material for: Associations between the Genetic Heritability of Dyslipidemia and Dietary Patterns in Korean Adults Based on Sex Differences
Source: MDPI journal article supplement (doi:10.3390/nu15204385), 2023-10-16
Supplement: s1 [file s1]

**Supplementary Table S1.** Demographic characteristics of the study participants in the entire cohort.

| Characteristic           |                  | Entire                               |                                          |
|--------------------------|------------------|--------------------------------------|------------------------------------------|
|                          |                  | Dyslipidemia<br>( <i>n</i> = 13,464) | Non-dyslipidemia<br>( <i>n</i> = 34,098) |
| Age, years               |                  | 58.44±0.067                          | 58.27±0.045*                             |
| Smoking status           | non-smoking      | 9371(71.4)                           | 25386(76.5)                              |
|                          | past smoking     | 1989(15.1)                           | 4862(14.7)                               |
|                          | current smoking  | 1773(13.5)                           | 2932(8.8)***                             |
| Drinking status          | non-drinking     | 7091(52.7)                           | 18223(53.5)                              |
|                          | past drinking    | 532(4.0)                             | 1290(3.8)                                |
|                          | current drinking | 5834(43.4)                           | 14569(42.7)                              |
| Waist circumference, cm  |                  | 82.96±0.072                          | 80.07±0.046***                           |
| Hip circumference, cm    |                  | 94.22±0.049                          | 93.19±0.030***                           |
| BMI, kg/m <sup>2</sup>   |                  | 24.44±0.025                          | 23.51±0.016***                           |
| Total cholesterol, mg/dL |                  | 225.81±0.388                         | 189.56±0.151***                          |
| Triglyceride, mg/dL      |                  | 181.79±0.962                         | 100.28±0.201***                          |
| LDL cholesterol, mg/dL   |                  | 140.10±0.360                         | 108.54±0.140***                          |
| HDL cholesterol, mg/dL   |                  | 51.72±0.146                          | 60.97±0.075***                           |
| GRS                      |                  | 29.90±0.028                          | 28.76±0.017***                           |

Values of continuous variables are presented as means and standard error of the mean (SEM), and those of categorical variables are presented as the number of subjects and percentages. Student's t-test and chi-square test were performed as appropriate. Significant differences between dyslipidemia and non-dyslipidemia groups in male and female cohorts separately are indicated by \*  $p < 0.05$ , \*\*  $p < 0.01$ , and \*\*\*  $p < 0.001$ . BMI, body mass index; GRS, genetic risk score.

**Supplementary Table S2.** Dietary patterns of the study participants in the entire cohort.

| Parameters      |             | Entire                               |                                          |
|-----------------|-------------|--------------------------------------|------------------------------------------|
|                 |             | Dyslipidemia<br>( <i>n</i> = 13,464) | Non-dyslipidemia<br>( <i>n</i> = 34,098) |
| Pork belly      | Low Intake  | 10555(78.4)                          | 26988(79.1)                              |
|                 | High Intake | 2909(21.6)                           | 7110(20.9)                               |
| Beef            | Low Intake  | 11847(88.0)                          | 30024(88.1)                              |
|                 | High Intake | 1617(12.0)                           | 4074(11.9)                               |
| Intestines      | Low Intake  | 9242(68.6)                           | 24053(70.5)                              |
|                 | High Intake | 4222(31.4)                           | 10045(29.5) <sup>***</sup>               |
| Sausages        | Low Intake  | 10143(75.3)                          | 25823(75.7)                              |
|                 | High Intake | 3321(24.7)                           | 8275(24.3)                               |
| Chicken         | Low Intake  | 9087(67.5)                           | 22918(67.2)                              |
|                 | High Intake | 4377(32.5)                           | 11180(32.8)                              |
| Soup            | Low Intake  | 10997(81.7)                          | 28015(82.2)                              |
|                 | High Intake | 2467(18.3)                           | 6083(17.8)                               |
| Instant noodles | Low Intake  | 10910(81.0)                          | 28253(82.9)                              |
|                 | High Intake | 2554(19.0)                           | 5845(17.1) <sup>***</sup>                |
| Snacks          | Low Intake  | 12075(89.7)                          | 30368(89.1)                              |
|                 | High Intake | 1389(10.3)                           | 3730(10.9) <sup>*</sup>                  |
| Soft drink      | Low Intake  | 9810(72.9)                           | 25846(75.8)                              |
|                 | High Intake | 3654(27.1)                           | 8252(24.2) <sup>***</sup>                |
| Coffee          | Low Intake  | 11015(81.8)                          | 28630(84.0)                              |
|                 | High Intake | 2449(18.2)                           | 5468(16.0) <sup>***</sup>                |

Categorical variables are presented as the number of subjects and percentages. Chi-square test was performed. Significant differences between dyslipidemia and non-dyslipidemia groups in male and female cohorts separately are indicated by <sup>\*</sup>*p* <0.05, <sup>\*\*</sup>*p* <0.01, and <sup>\*\*\*</sup>*p* <0.001.

**Supplementary Table S3.** Significant SNPs related to dyslipidemia in the entire cohort.

| CHR | SNP         | POS              | Mi | Ma | <i>p</i> -value | Gene                        | MAF     | OR     | LB     | UB     |
|-----|-------------|------------------|----|----|-----------------|-----------------------------|---------|--------|--------|--------|
| 2   | rs13306194  | 2:21252534_G/A   | G  | A  | 7.03E−16        | APOB                        | 0.1061  | 0.8305 | 0.7938 | 0.8688 |
| 2   | rs1260326   | 2:27730940_T/C   | T  | C  | 6.26E−24        | GCKR                        | 0.4261  | 0.8628 | 0.8384 | 0.8879 |
| 8   | rs117026536 | 8:19818773_G/T   | G  | T  | 1.05E−15        | LPL                         | 0.2776  | 0.8347 | 0.7987 | 0.8724 |
| 8   | rs2954031   | 8:126491733_G/T  | G  | T  | 9.50E−20        | TRIB1                       | 0.1111  | 1.141  | 1.109  | 1.174  |
| 8   | rs3087723   | 8:126761402_C/T  | C  | T  | 2.93E−08        | LOC105375747                | 0.4747  | 1.094  | 1.06   | 1.13   |
| 9   | rs9411474   | 9:136125716_C/G  | G  | C  | 6.28E−12        | ABO                         | 0.2461  | 1.123  | 1.086  | 1.161  |
| 11  | rs7946423   | 11:116503403_A/T | T  | A  | 2.74E−11        | LOC107984372                | 0.1171  | 1.164  | 1.113  | 1.218  |
| 11  | rs1240772   | 11:116519129_G/C | C  | G  | 1.28E−08        | LINC02702                   | 0.3423  | 1.091  | 1.059  | 1.124  |
| 11  | rs1145211   | 11:116557216_A/C | C  | A  | 5.12E−15        | <i>SIDT2</i>                | 0.2283  | 0.875  | 0.8462 | 0.9048 |
| 11  | rs61346349  | 11:116580798_A/G | A  | G  | 2.08E−08        | <i>Consequence<br/>none</i> | 0.09967 | 0.8752 | 0.8354 | 0.917  |
| 11  | rs117785509 | 11:116586231_G/A | G  | A  | 6.00E−09        | SLC22A4                     | 0.05827 | 0.8392 | 0.7911 | 0.8903 |
| 11  | rs79408961  | 11:116588593_C/T | T  | C  | 1.69E−20        | PADI4                       | 0.09822 | 1.26   | 1.2    | 1.323  |
| 11  | rs651821    | 11:116662579_C/T | C  | T  | 2.49E−132       | APOA5                       | 0.3569  | 1.461  | 1.417  | 1.506  |
| 11  | rs9804646   | 11:116665079_C/T | C  | T  | 2.66E−29        | APOA5                       | 0.1361  | 0.7937 | 0.7624 | 0.8263 |
| 11  | rs78044162  | 11:116837089_C/T | C  | C  | 7.99E−20        | SIK3                        | 0.1566  | 0.837  | 0.8055 | 0.8696 |
| 11  | rs4635117   | 11:116981001_A/G | A  | G  | 1.36E−11        | TAGLN                       | 0.2601  | 1.118  | 1.083  | 1.155  |
| 11  | rs17120523  | 11:117094591_A/G | A  | G  | 2.72E−11        | PCSK7                       | 0.1012  | 0.8545 | 0.8159 | 0.895  |
| 16  | rs56156922  | 16:56987369_T/C  | T  | C  | 1.49E−10        | CETP                        | 0.1594  | 0.883  | 0.85   | 0.9172 |
| 16  | rs9926440   | 16:57002663_C/G  | C  | G  | 1.23E−09        | CETP                        | 0.3268  | 1.098  | 1.066  | 1.132  |
| 19  | rs2738464   | 19:11242307_G/C  | C  | G  | 7.31E−09        | LDLR                        | 0.2755  | 0.9112 | 0.8829 | 0.9404 |
| 19  | rs737337    | 19:11347493_T/C  | T  | C  | 5.33E−10        | DOCK6                       | 0.2653  | 0.9043 | 0.876  | 0.9335 |
| 19  | rs3112438   | 19:45359570_A/G  | A  | G  | 2.85E−08        | NECTIN2                     | 0.0495  | 0.8343 | 0.7826 | 0.8894 |
| 19  | rs111784051 | 19:45402262_T/G  | T  | G  | 3.50E−22        | TOMM40                      | 0.0557  | 0.7445 | 0.7013 | 0.7903 |
| 19  | rs429358    | 19:45411941_T/C  | C  | T  | 3.48E−29        | APOE                        | 0.114   | 1.301  | 1.243  | 1.362  |
| 19  | rs12709889  | 19:45453239_G/A  | G  | A  | 1.20E−11        | APOC2                       | 0.4375  | 0.9064 | 0.881  | 0.9325 |

CHR, chromosome; SNP, single nucleotide polymorphism; Mi, minor allele; Ma, major allele; MAF, minor allele frequency; OR, odds ratio; LB, lower bound; UB, upper bound. The *p*-value for the OR was adjusted for age and BMI.

**Supplementary Table S4.** Comparison of biochemical parameters by quartiles of the genetic risk score in middle-aged.

|                         | Male                                  |                                       |                                       | Female                                |                                       |                                       |
|-------------------------|---------------------------------------|---------------------------------------|---------------------------------------|---------------------------------------|---------------------------------------|---------------------------------------|
|                         | 1 <sup>st</sup> quartile<br>(n=2,474) | 2 <sup>nd</sup> quartile<br>(n=3,138) | 3 <sup>rd</sup> quartile<br>(n=2,667) | 1 <sup>st</sup> quartile<br>(n=6,278) | 2 <sup>nd</sup> quartile<br>(n=7,017) | 3 <sup>rd</sup> quartile<br>(n=7,368) |
| HbA1c, %                | 5.634±0.0166                          | 5.605±0.0133                          | 5.609±0.0157                          | 5.609±0.0085                          | 5.601±0.008                           | 5.61±0.0079                           |
| λ-GTP, IU/L             | 44.41±1.145                           | 46.99±1.022                           | 48.44±1.3                             | 22.13±0.281                           | 22.62±0.289                           | 22.4±0.255                            |
| Albumin, g/dL           | 4.719±0.0048                          | 4.721±0.004                           | 4.717±0.0045                          | 4.609±0.0028                          | 4.607±0.0027                          | 4.609±0.0026                          |
| AST, IU/L               | 26.04±0.339                           | 25.82±0.206                           | 26.52±0.323                           | 23.88±0.109                           | 24.08±0.15                            | 23.94±0.143                           |
| ALP, IU/L               | 64.49±0.344                           | 65.22±0.453                           | 65.84±0.348                           | 67.54±0.264                           | 67.93±0.24                            | 67.37±0.238                           |
| ALT, IU/L               | 26.74±0.465                           | 26.19±0.283                           | 26.3±0.32                             | 20.33±0.142                           | 20.88±0.205                           | 20.56±0.18                            |
| Creatinine,<br>mg/dL    | 0.959±0.007                           | 0.954±0.006                           | 0.948±0.003                           | 0.7±0.002                             | 0.704±0.002                           | 0.702±0.002                           |
| Blood Calcium,<br>mg/dL | 9.535±0.0074                          | 9.553±0.0063                          | 9.55±0.0065                           | 9.497±0.0048                          | 9.5±0.0045                            | 9.5±0.0043                            |

Values represent means ± SEM from one-way ANOVA with the post-hoc Scheffé test. HbA1c, hemoglobin A1c; λ-GTP, gamma-glutamyl transferase; AST, aspartate aminotransferase; ALP, alkaline phosphatase; ALT, alanine transaminase.

**Supplementary Table S5.** Comparison of biochemical parameters by quartiles of the genetic risk score in elderly.

|                         | Male                                  |                                       |                                       | Female                                |                                       |                                       |
|-------------------------|---------------------------------------|---------------------------------------|---------------------------------------|---------------------------------------|---------------------------------------|---------------------------------------|
|                         | 1 <sup>st</sup> quartile<br>(n=2,370) | 2 <sup>nd</sup> quartile<br>(n=2,891) | 3 <sup>rd</sup> quartile<br>(n=2,329) | 1 <sup>st</sup> quartile<br>(n=3,324) | 2 <sup>nd</sup> quartile<br>(n=3,654) | 3 <sup>rd</sup> quartile<br>(n=4,052) |
| HbA1c, %                | 5.797±0.017                           | 5.796±0.0153                          | 5.771±0.0168                          | 5.646±0.0119                          | 5.661±0.0112                          | 5.639±0.0105                          |
| λ-GTP, IU/L             | 36.49±0.988                           | 38.36±0.995                           | 41.41±1.495*                          | 22.04±0.39                            | 23.62±0.431*                          | 22.57±0.362                           |
| Albumin, g/dL           | 4.607±0.005                           | 4.613±0.0047                          | 4.614±0.0049                          | 4.606±0.0039                          | 4.605±0.0037                          | 4.65±0.0035                           |
| AST, IU/L               | 25.61±0.227                           | 26.02±0.213                           | 26.52±0.418                           | 24.06±0.164                           | 24.4±0.155                            | 24.18±0.167                           |
| ALP, IU/L               | 66.99±0.428                           | 67.3±0.356                            | 67.9±0.39                             | 67.78±0.343                           | 68.98±0.334*                          | 68.21±0.317                           |
| ALT, IU/L               | 23.09±0.267                           | 23.34±0.279                           | 23.65±0.301                           | 20.47±0.231                           | 20.95±0.2                             | 20.46±0.211                           |
| Creatinine,<br>mg/dL    | 0.977±0.006                           | 0.977±0.005                           | 0.995±0.01                            | 0.709±0.003                           | 0.708±0.003                           | 0.71±0.004                            |
| Blood Calcium,<br>mg/dL | 9.459±0.0074                          | 9.459±0.0065                          | 9.488±0.0077*+                        | 9.498±0.0065                          | 9.505±0.0065                          | 9.5±0.0057                            |

Values represent means ± SEM from one-way ANOVA with the post-hoc Scheffé test. HbA1c, hemoglobin A1c; λ-GTP, gamma-glutamyl transferase; AST, aspartate aminotransferase; ALP, alkaline phosphatase; ALT, alanine transaminase. Significant differences versus 1<sup>st</sup> quartile at \*  $p < 0.05$ . Significant differences versus 2<sup>nd</sup> quartile at +  $p < 0.05$ .

**Supplementary Table S6.** Effects of GRS and dietary patterns interactions on dyslipidemia in the entire cohort.

| A. Meats                                     |             |                             |                             |                             |                 |
|----------------------------------------------|-------------|-----------------------------|-----------------------------|-----------------------------|-----------------|
| Groups                                       |             | Entire                      |                             |                             | <i>p</i> -value |
|                                              |             | 1 <sup>st</sup><br>quartile | 2 <sup>nd</sup><br>quartile | 3 <sup>rd</sup><br>quartile |                 |
| Pork belly                                   | Low Intake  | 1                           | 1.469(1.384–1.558)          | 2.243(2.115–2.378)          | 0.378           |
|                                              | High Intake | 1                           | 1.600(1.429–1.791)          | 2.306(2.060–2.581)          |                 |
| Beef                                         | Low Intake  | 1                           | 1.501(1.419–1.587)          | 2.295(2.171–2.426)          | 0.285           |
|                                              | High Intake | 1                           | 1.467(1.263–1.704)          | 2.000(1.723–2.322)          |                 |
| Intestines                                   | Low Intake  | 1                           | 1.495(1.404–1.593)          | 2.207(2.073–2.349)          | 0.181           |
|                                              | High Intake | 1                           | 1.495(1.360–1.644)          | 2.377(2.164–2.611)          |                 |
| Sausages                                     | Low Intake  | 1                           | 1.492(1.404–1.585)          | 2.282(2.150–2.423)          | 0.525           |
|                                              | High Intake | 1                           | 1.513(1.361–1.682)          | 2.186(1.966–2.341)          |                 |
| Chicken                                      | Low Intake  | 1                           | 1.485(1.393–1.583)          | 2.271(2.131–2.149)          | 0.514           |
|                                              | High Intake | 1                           | 1.518(1.385–1.664)          | 2.231(2.037–2.445)          |                 |
| B. Soup, instant noodles, snacks, and drinks |             |                             |                             |                             |                 |
| Groups                                       |             | Entire                      |                             |                             | <i>p</i> -value |
|                                              |             | 1 <sup>st</sup><br>quartile | 2 <sup>nd</sup><br>quartile | 3 <sup>rd</sup><br>quartile |                 |
| Soup                                         | Low Intake  | 1                           | 1.529(1.442–1.620)          | 2.297(2.168–2.433)          | 0.930           |
|                                              | High Intake | 1                           | 1.356(1.200–1.532)          | 2.089(1.850–2.359)          |                 |
| Instant noodles                              | Low Intake  | 1                           | 1.497(1.412–1.587)          | 2.271(2.144–2.406)          | 0.190           |
|                                              | High Intake | 1                           | 1.504(1.331–1.699)          | 2.217(1.962–2.505)          |                 |
| Snacks                                       | Low Intake  | 1                           | 1.518(1.436–1.605)          | 2.302(2.718–2.432)          | 0.162           |
|                                              | High Intake | 1                           | 1.322(1.127–1.550)          | 1.906(1.625–2.235)          |                 |
| Soft drink                                   | Low Intake  | 1                           | 1.456(1.369–1.547)          | 2.229(2.098–2.367)          | < 0.001         |
|                                              | High Intake | 1                           | 1.609(1.452–1.782)          | 2.334(2.106–2.558)          |                 |
| Coffee                                       | Low Intake  | 1                           | 1.500(1.416–1.589)          | 2.244(2.119–2.377)          | 0.050           |
|                                              | High Intake | 1                           | 1.471(1.299–1.666)          | 2.320(2.050–2.262)          |                 |

Values represent the adjusted OR, 95% CI, and *p*-value for interaction with GRS. Binary multivariable logistic regression was conducted with the cross-product of the dietary group and GRS quartiles and adjusted for covariates, including age and BMI. The 1<sup>st</sup> quartile of the GRS was set as the reference.
